# Supplementary material for: Interplay between DNA damage repair and apoptosis shapes cancer evolution through aneuploidy and microsatellite instability
Source: PubMed Central journal article supplement (PMC7060240; doi:10.1038/s41467-020-15094-2), 2020-03-06
Supplement: 41467_2020_15094_MOESM3_ESM.pdf [file 41467_2020_15094_MOESM3_ESM.pdf]

### **Description of Additional Supplementary Files**

File Name: Supplementary Data 1

Description: Aneuploidy and clinical data for 8686 TCGA tumor samples considered

File Name: Supplementary Data 2

Description: Gene grouping into DNA damage response pathways

File Name: Supplementary Data 3

Description: Pan cancer driver genes considered

File Name: Supplementary Data 4

Description: Selection p-values assigned to selected DNA damage response genes in each tumor type (binomial p-value) and tumor cluster ( $X^2$  P-values)
